# Supplementary material
Source: Royal Society of Chemistry journal article supplement (doi:10.1039/d6ay00086j)
Supplement: d6ay00086j1.pdf [file d6ay00086j1.pdf]

# Accurate quantification of polyester in textiles through complete depolymerisation and HPLC

*Mattia Cerri<sup>a\*</sup>, Leena Pitkänen<sup>a</sup>, Corné Schutgens<sup>a</sup>, and Michael Hummel<sup>a\*</sup>*

<sup>a</sup>Department of Bioproducts and Biosystems, School of Chemical Engineering, Aalto University, Espoo, Finland

## SUPPLEMENTARY INFORMATION

✉ Corresponding author:

Mattia Cerri; email: [mattia.cerri@aalto.fi](mailto:mattia.cerri@aalto.fi), phone: +358(0)505764202

Michael Hummel; email: [michael.hummel@aalto.fi](mailto:michael.hummel@aalto.fi), phone: +358(0)505124198



## TABLE OF CONTENTS

|                                                     |   |
|-----------------------------------------------------|---|
| S1: UV-vis spectra of terephthalic acid in solution | 5 |
| S2: Stability of terephthalic acid in solution      | 6 |
| S3: R packages used for data analysis               | 7 |
| S4: Sample chromatograms of different fibres        | 8 |



**S1: UV-VIS SPECTRA OF TEREPHTHALIC ACID IN SOLUTION**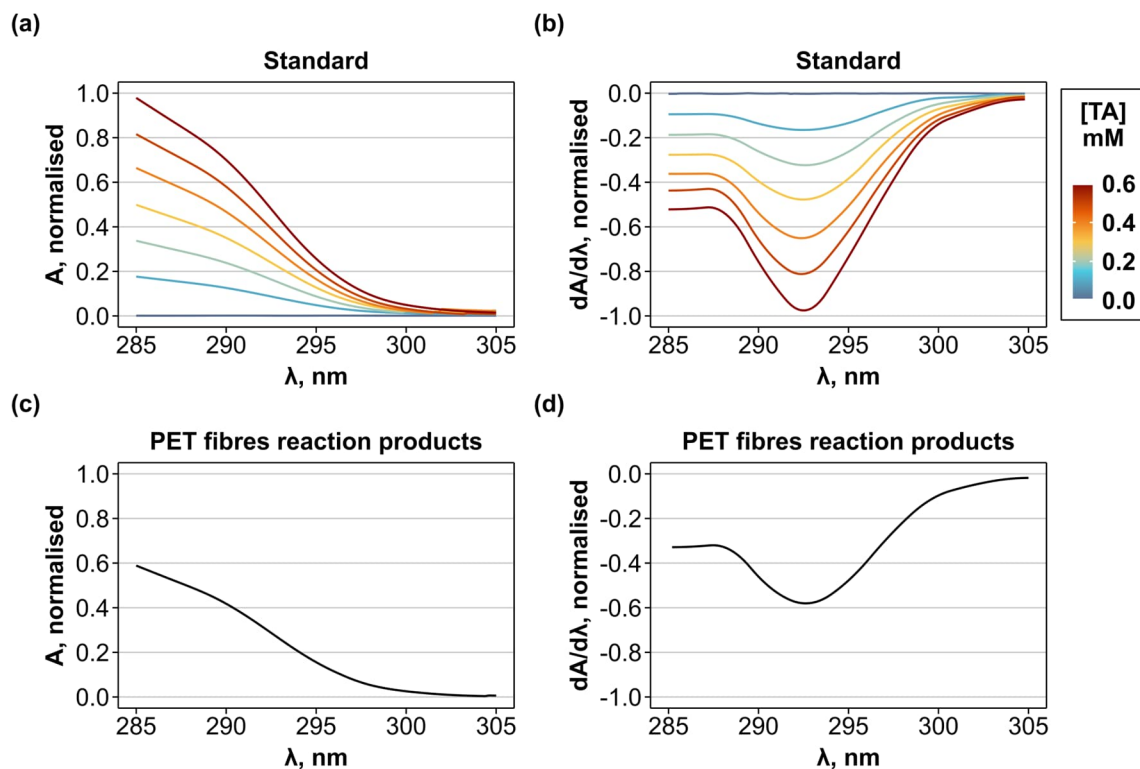

**Figure S1.** (a) UV-vis absorbance (A) as a function of the wavelength ( $\lambda$ ) for terephthalic acid (TA) in solution (0.125 M KOH, 10% methanol by volume, 10% deionised water, and 80% of 0.25% w:v ammonia) at different concentrations; (b) derivative of the absorbance curves in (a) with respect to the wavelength; (c) UV-vis absorbance as a function of the wavelength for the depolymerisation products of poly(ethylene terephthalate) (PET) fibres in solution (0.125 M KOH, 10% methanol by volume, 10% deionised water, and 80% of 0.25% w:v ammonia); (d) derivative of the absorbance curves in (c) with respect to the wavelength. Values on the y axis were normalised for simplicity.

## S2: STABILITY OF TEREPHTHALIC ACID IN SOLUTION

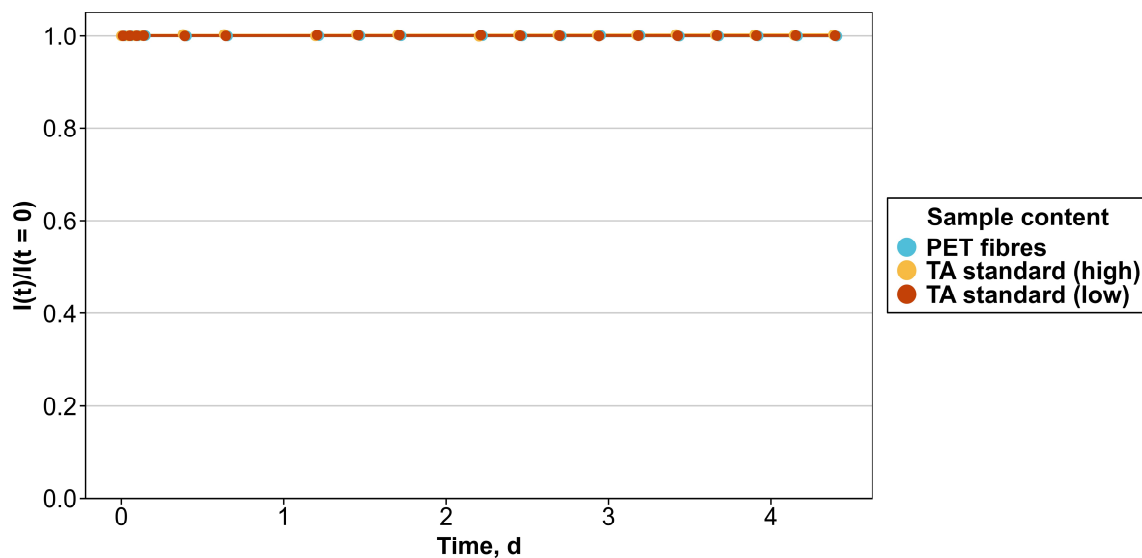

**Figure S2.** Normalised signal intensity for solutions of terephthalic acid (TA) either from a standard dilution, or the depolymerisation of poly(ethylene terephthalate) (PET) fibres. Each sample initially contained approximately 30 mg (PET fibres; TA standard, high) or 15 mg (TA standard, low) of material. The fibre sample was processed and diluted following the same steps described in the manuscript. TA was dissolved directly in the same solvent volume used for the depolymerisation of fibre samples, then diluted analogously. Samples were maintained at 15°C in the dark in the autosampler of the HPLC instrument and injected repeatedly. The intensity of each time series (peak area over time) is normalised to its corresponding initial value (min ratio = 0.999, max ratio = 1.003).

### S3: R PACKAGES USED FOR DATA ANALYSIS

**Table S1.** R packages used for data analysis. Information was retrieved on the 16<sup>th</sup> of March 2026.

| Name         | Version  | Released | Maintainer             | Email                           |
|--------------|----------|----------|------------------------|---------------------------------|
| baseline     | 1.3.7    | Jun 2025 | Kristian Hovde Liland  | kristian.liland@nmbu.no         |
| boot         | 1.3.32   | Aug 2025 | Alessandra R. Brazzale | brazzale@stat.unipd.it          |
| bootstrap    | 2019.6   | Jun 2019 | Scott Kostyshak        | scott.kostyshak@gmail.com       |
| broom        | 1.0.12   | Jan 2026 | Emil Hvitfeldt         | emil.hvitfeldt@posit.co         |
| car          | 3.1.5    | Jan 2026 | Brad Price             | brad.price@mail.wvu.edu         |
| chemCal      | 0.2.3    | Mar 2022 | Johannes Ranke         | johannes.ranke@jrwb.de          |
| chemometrics | 1.4.4    | Aug 2023 | Peter Filzmoser        | Peter.Filzmoser@tuwien.ac.at    |
| data.table   | 1.18.2.1 | Jan 2026 | Tyson Barrett          | t.barrett88@gmail.com           |
| DescTools    | 0.99.60  | Mar 2025 | Andri Signorell        | andri@signorell.net             |
| effectsize   | 1.0.1    | May 2025 | Mattan S. Ben-Shachar  | mattansb@msbstats.info          |
| egg          | 0.4.5    | Jul 2019 | Baptiste Auguie        | baptiste.auguie@gmail.com       |
| fs           | 1.6.7    | Mar 2026 | Jeroen Ooms            | jeroenooms@gmail.com            |
| furrr        | 0.3.1    | Aug 2022 | Davis Vaughan          | davis@rstudio.com               |
| future.apply | 1.20.2   | Feb 2026 | Henrik Bengtsson       | henrikb@braju.com               |
| ggflowchart  | 1.0.0    | May 2023 | Nicola Rennie          | nrennie35@gmail.com             |
| ggh4x        | 0.3.1    | May 2025 | Teun van den Brand     | tahvdbrand@gmail.com            |
| ggpubr       | 0.6.3    | Feb 2026 | Alboukadel Kassambara  | alboukadel.kassambara@gmail.com |
| gridExtra    | 2.3      | Sep 2017 | Baptiste Auguie        | baptiste.auguie@gmail.com       |
| gt           | 1.3.0    | Jan 2026 | Richard Iannone        | rich@posit.co                   |
| Hmisc        | 5.2.5    | Jan 2026 | Frank E Harrell Jr     | fh@fharrell.com                 |
| lemon        | 0.5.2    | Sep 2025 | Stefan M. Edwards      | sme@iysik.com                   |
| magick       | 2.9.1    | Feb 2026 | Jeroen Ooms            | jeroenooms@gmail.com            |
| magrittr     | 2.0.4    | Sep 2025 | Lionel Henry           | lionel@posit.co                 |
| MASS         | 7.3.65   | Feb 2025 | Brian Ripley           | Brian.Ripley@R-project.org      |
| mgcv         | 1.9.4    | Nov 2025 | Simon Wood             | simon.wood@r-project.org        |
| miceadds     | 3.18.36  | Sep 2025 | Alexander Robitzsch    | robitzsch@ipn.uni-kiel.de       |
| multcomp     | 1.4.30   | Mar 2026 | Torsten Hothorn        | Torsten.Hothorn@R-project.org   |
| patchwork    | 1.3.2    | Aug 2025 | Thomas Lin Pedersen    | thomasp85@gmail.com             |
| plyr         | 1.8.9    | Oct 2023 | Hadley Wickham         | hadley@rstudio.com              |
| pracma       | 2.4.6    | Oct 2025 | Hans W. Borchers       | hwborchers@googlemail.com       |
| predictmeans | 1.1.1    | Nov 2024 | Dongwen Luo            | dongwen.luo@agresearch.co.nz    |
| quantmod     | 0.4.28   | Jun 2025 | Joshua M. Ulrich       | josh.m.ulrich@gmail.com         |
| reghelper    | 1.1.2    | Sep 2023 | Jeffrey Hughes         | jeff.hughes@gmail.com           |
| reshape2     | 1.4.5    | Nov 2025 | Hadley Wickham         | hadley@posit.co                 |
| see          | 0.13.0   | Jan 2026 | Daniel Lüdecke         | officialesystats@gmail.com      |
| SimplyAgree  | 0.3.0    | Jan 2026 | Aaron Caldwell         | arcaldwell49@gmail.com          |
| statip       | 0.2.3    | Nov 2019 | Paul Poncet            | paulponcet@yahoo.fr             |
| tidyverse    | 2.0.0    | Feb 2023 | Hadley Wickham         | hadley@rstudio.com              |

## S4: SAMPLE CHROMATOGRAMS OF DIFFERENT FIBRES

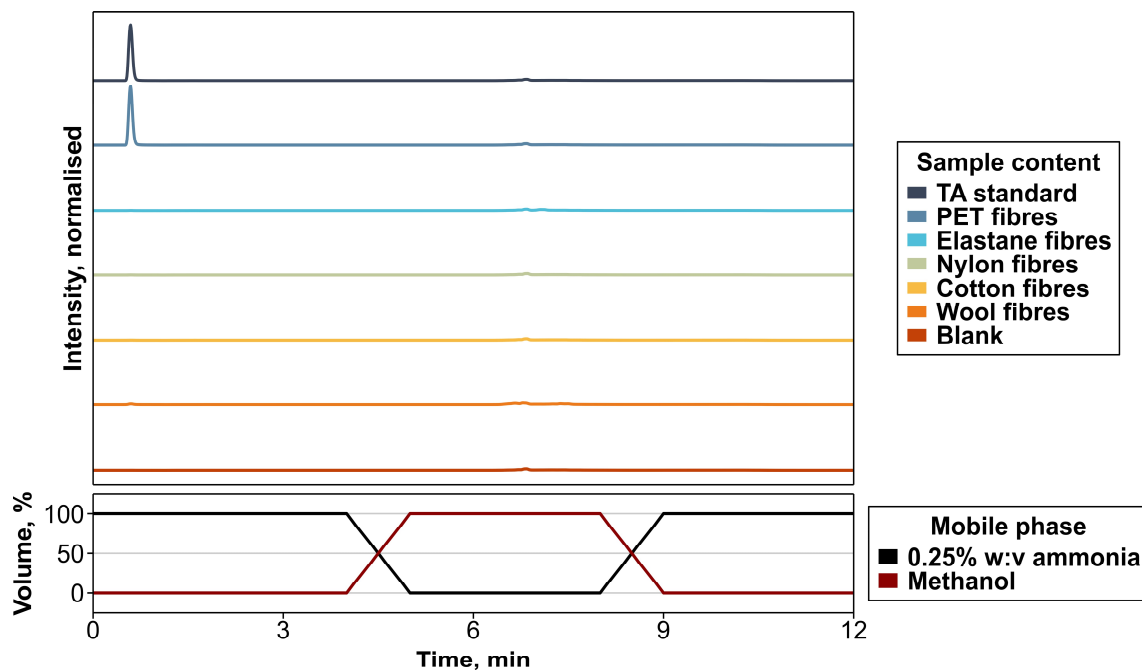

**Figure S3. Top:** chromatograms of samples containing either a standard solution of terephthalic acid (TA), or the depolymerisation products of poly(ethylene terephthalate) (PET), elastane, nylon, cotton, or wool fibres, and a blank reference (0.125 M KOH, 10% methanol by volume, 10% deionised water, and 80% of 0.25% w:v ammonia, matching the solvent matrix after resolubilisation and dilution of the samples). Each sample initially contained approximately 30 mg of material. All fibre samples were processed and diluted following the same steps described in the manuscript. TA was dissolved directly in the same solvent volume used for the depolymerisation of fibre samples, then diluted analogously. Signal intensity (absorbance at 245 nm) was normalised to the peak height of the PET sample. **Bottom:** mobile phase settings during the measurement.
